# Supplementary figures and images for: Terahertz Time Domain, Raman and Fourier Transform Infrared Spectroscopy of Acrylamide, and the Application of Density Functional Theory
Source: Hindawi journal article supplement (doi:10.1155/2013/148903), 2013-01-01

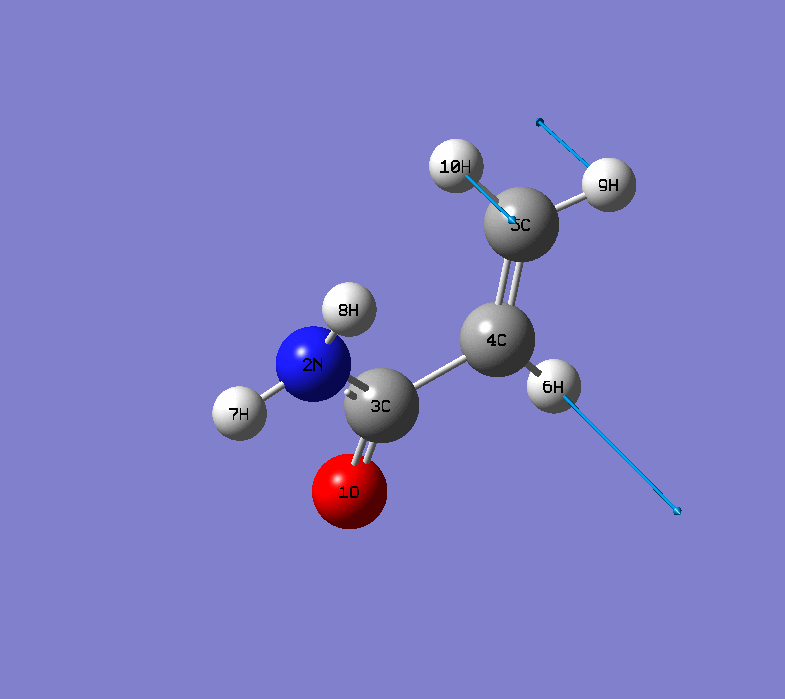

Supplement: f1 [file 148903.f1.zip › Supplymentary Material/1038.56.gif]

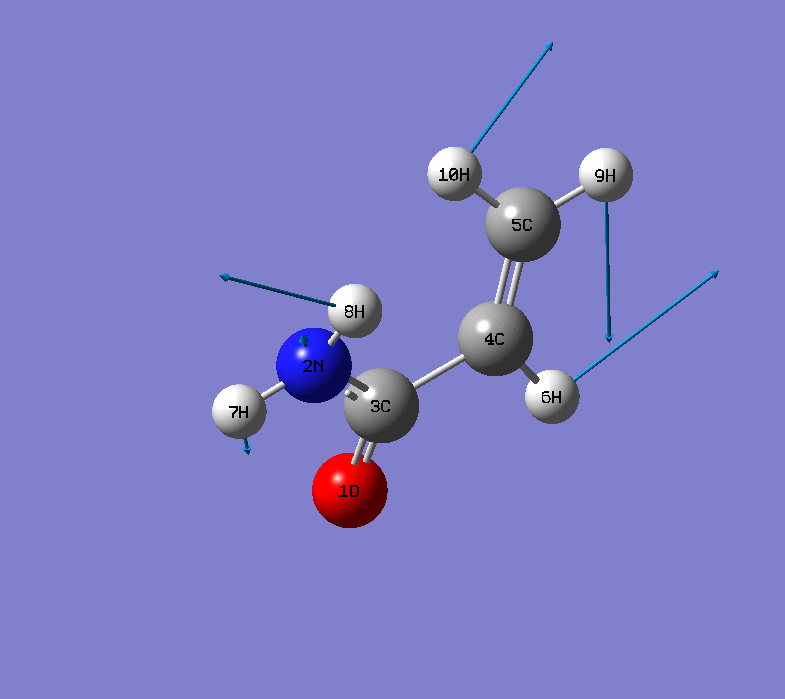

Supplement: f1 [file 148903.f1.zip › Supplymentary Material/1043.85.gif]

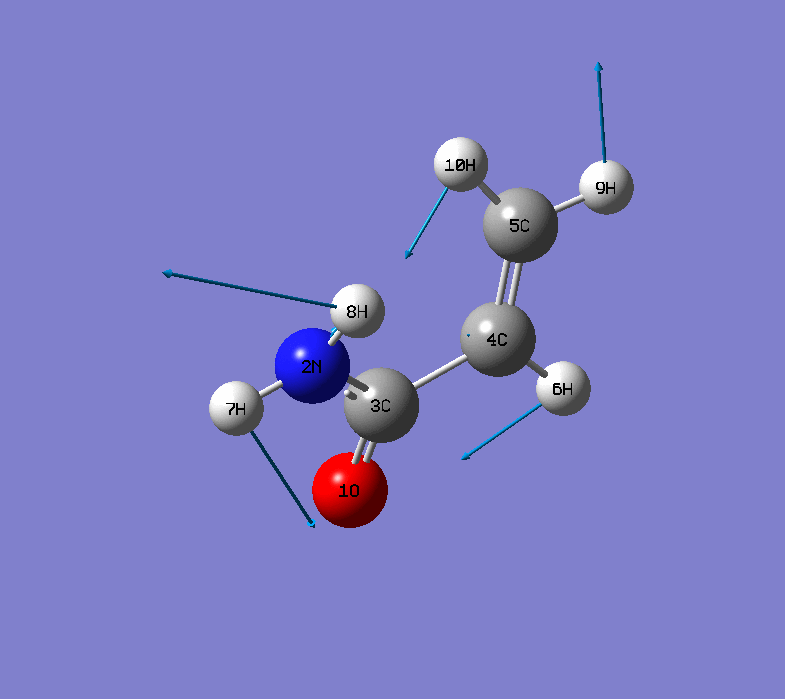

Supplement: f1 [file 148903.f1.zip › Supplymentary Material/1113.69.gif]

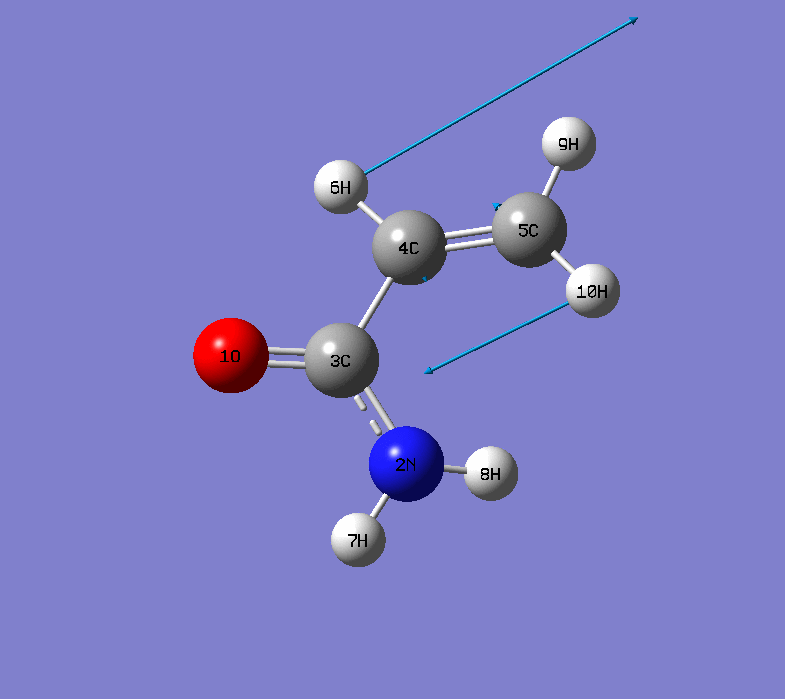

Supplement: f1 [file 148903.f1.zip › Supplymentary Material/1310.66.gif]

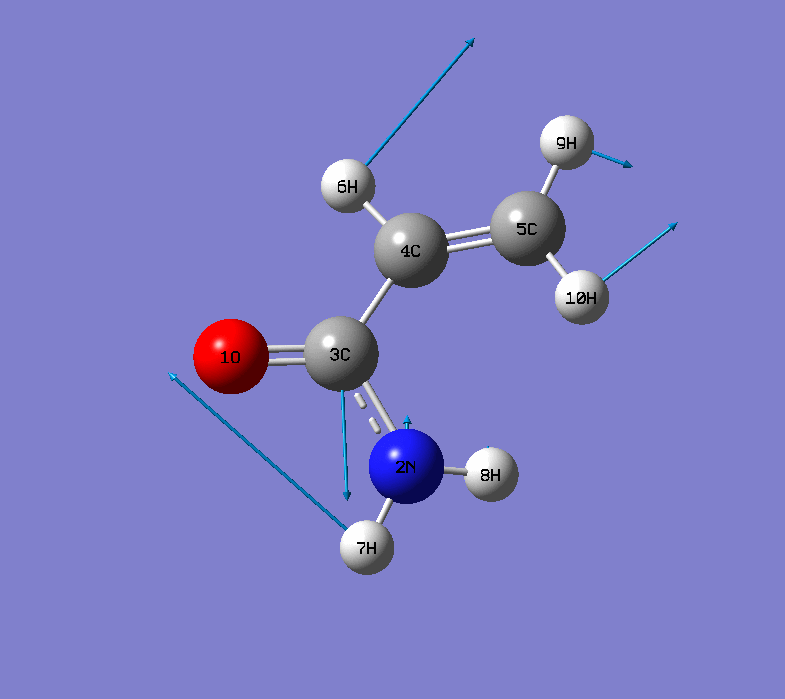

Supplement: f1 [file 148903.f1.zip › Supplymentary Material/1359.85.gif]

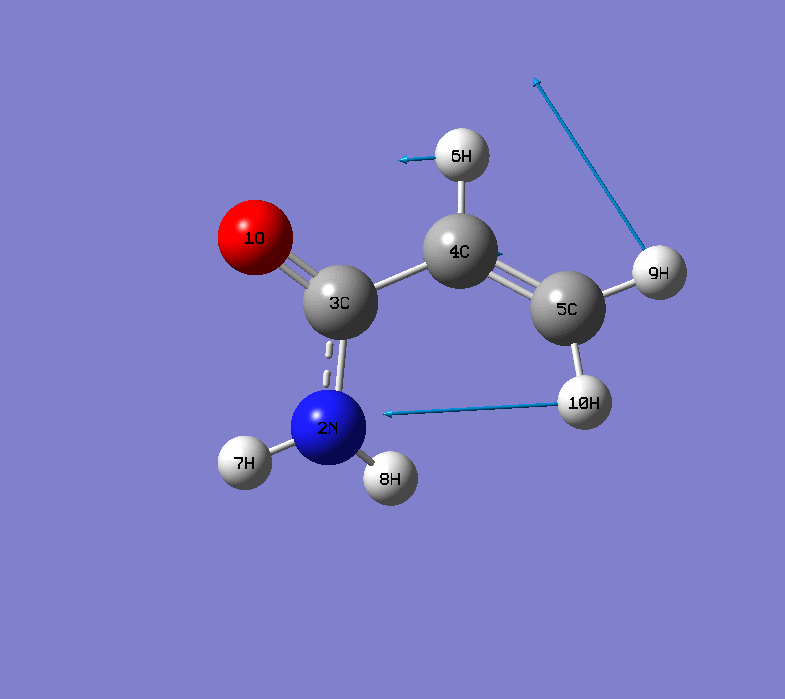

Supplement: f1 [file 148903.f1.zip › Supplymentary Material/1455.77.gif]

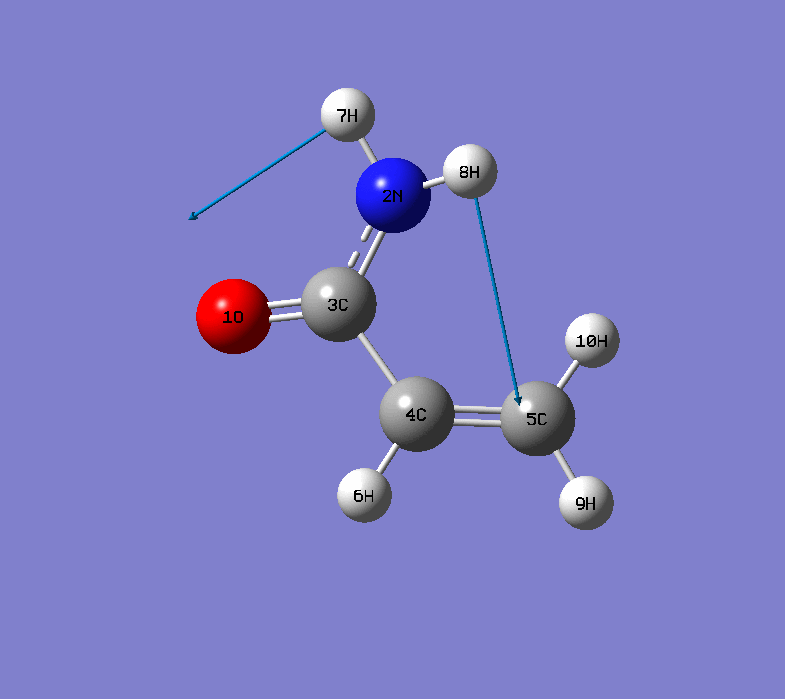

Supplement: f1 [file 148903.f1.zip › Supplymentary Material/1618.20.gif]

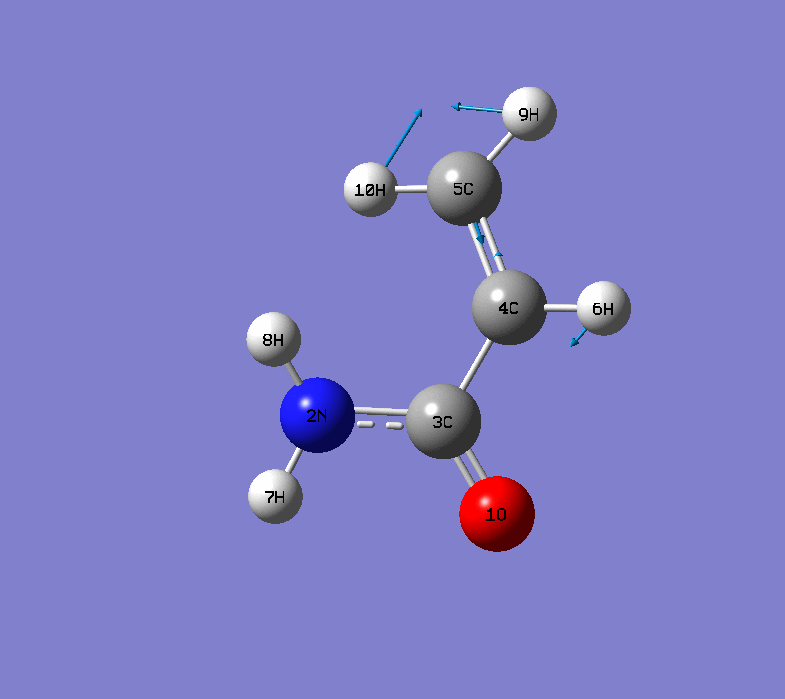

Supplement: f1 [file 148903.f1.zip › Supplymentary Material/1681.96.gif]

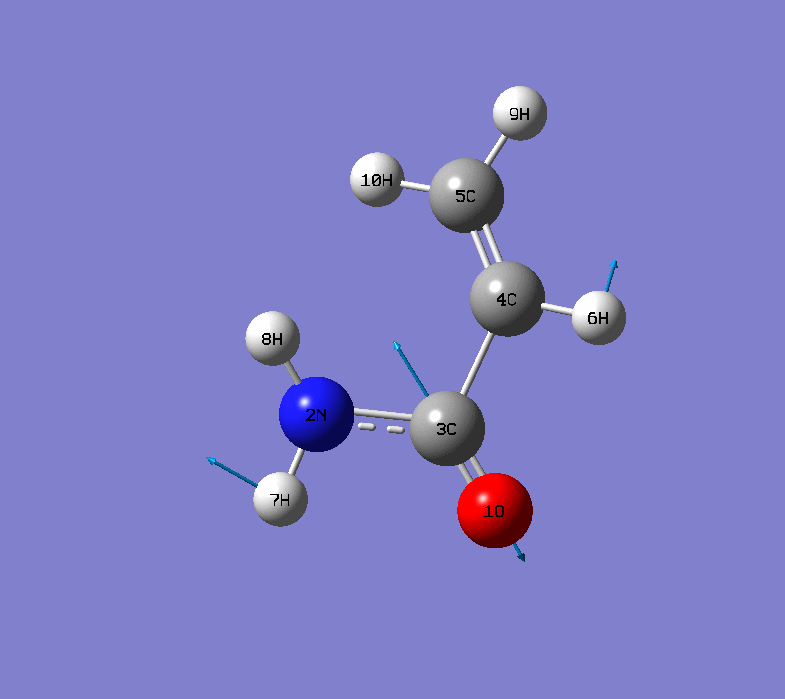

Supplement: f1 [file 148903.f1.zip › Supplymentary Material/1750.54.gif]

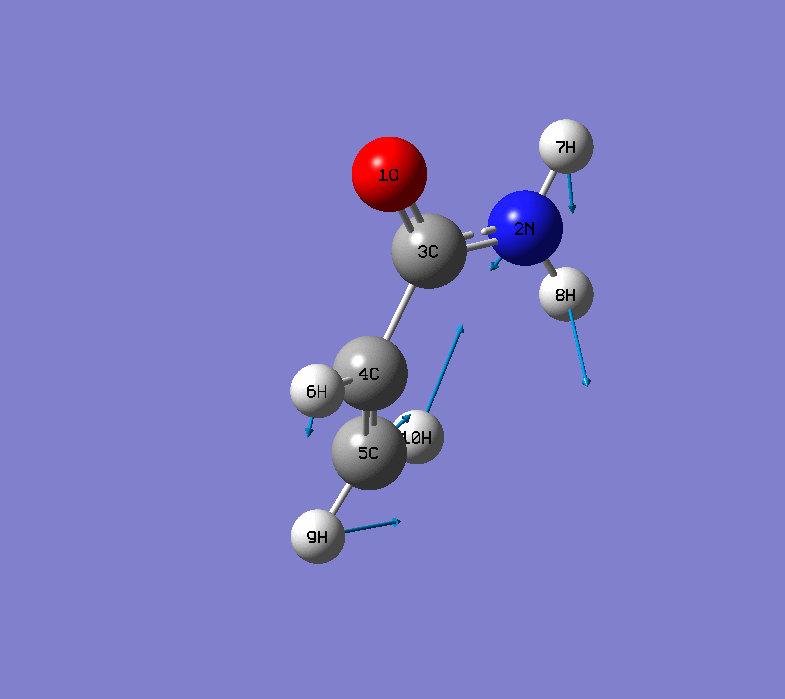

Supplement: f1 [file 148903.f1.zip › Supplymentary Material/275.05.gif]

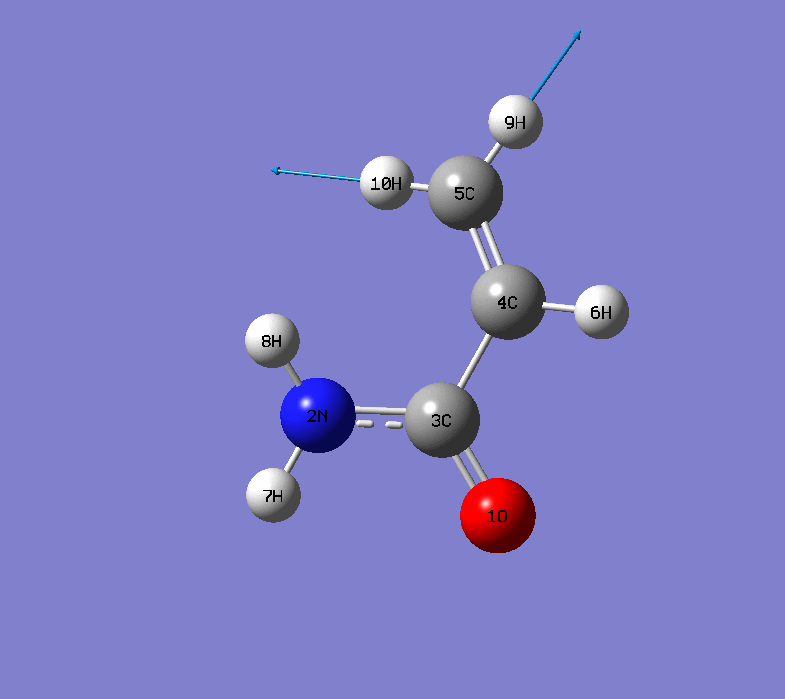

Supplement: f1 [file 148903.f1.zip › Supplymentary Material/3139.86.gif]

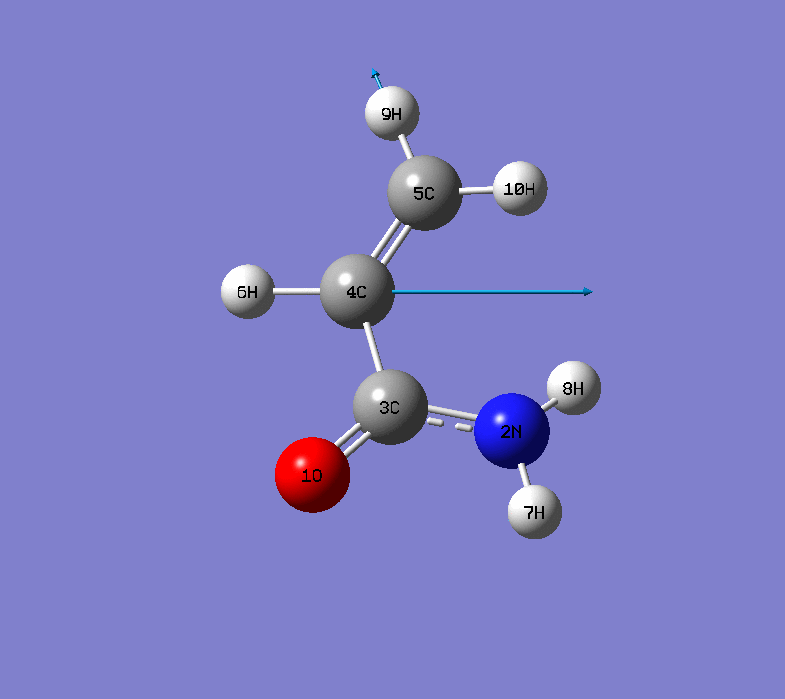

Supplement: f1 [file 148903.f1.zip › Supplymentary Material/3182.91.gif]

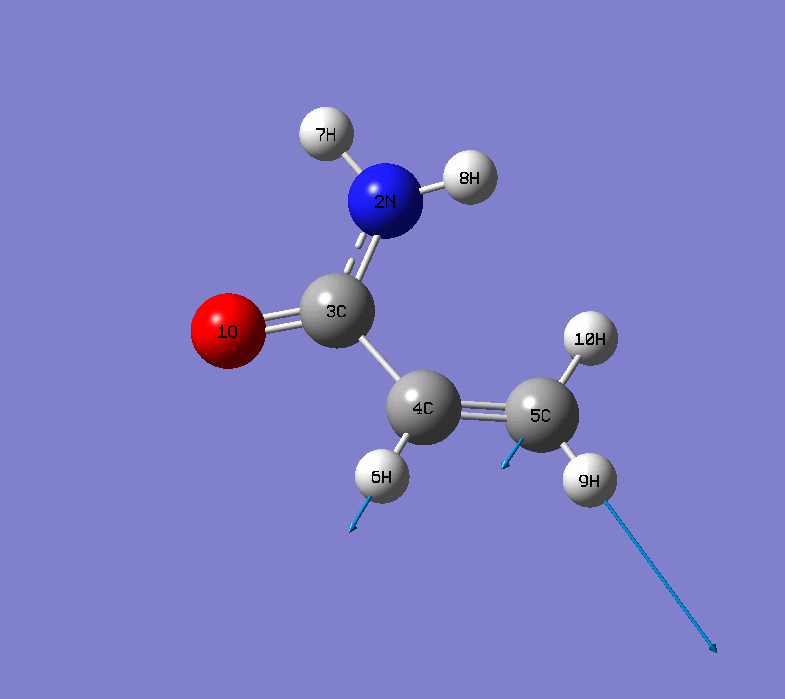

Supplement: f1 [file 148903.f1.zip › Supplymentary Material/3222.77.gif]

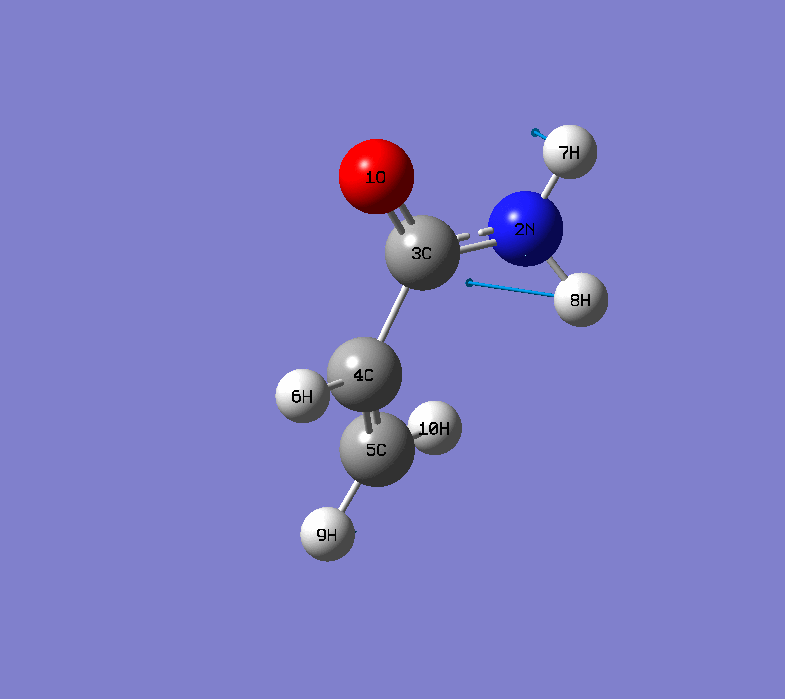

Supplement: f1 [file 148903.f1.zip › Supplymentary Material/330.08.gif]

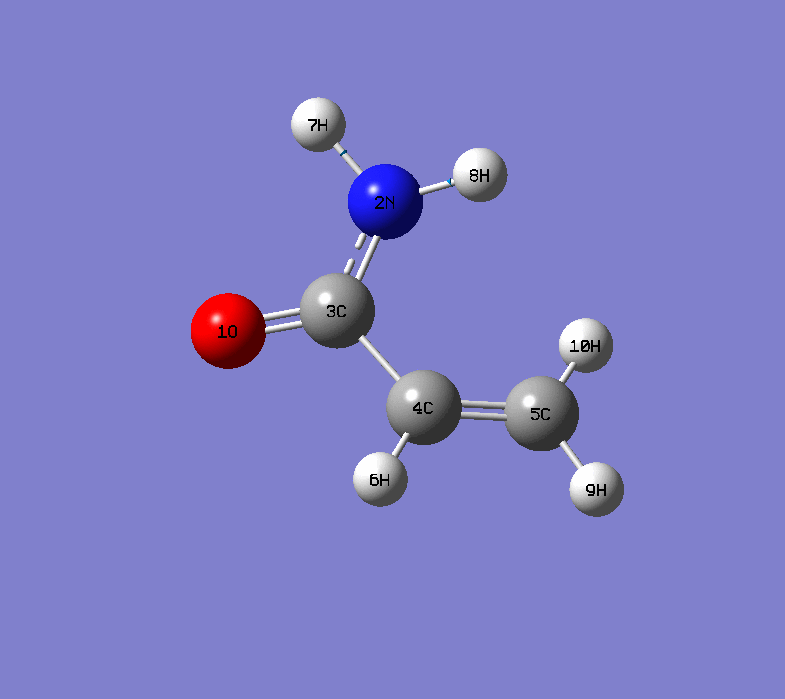

Supplement: f1 [file 148903.f1.zip › Supplymentary Material/3588.71.gif]

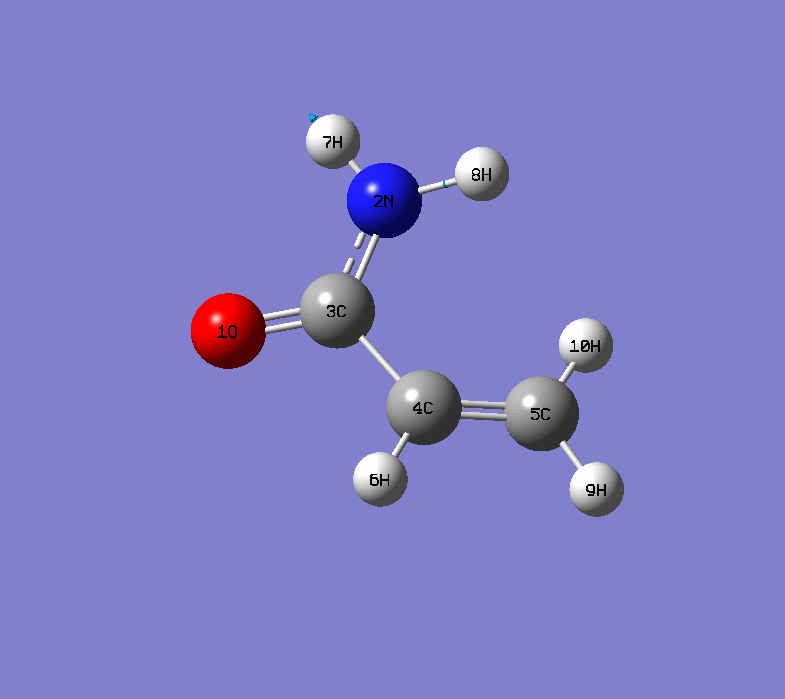

Supplement: f1 [file 148903.f1.zip › Supplymentary Material/3716.11.gif]

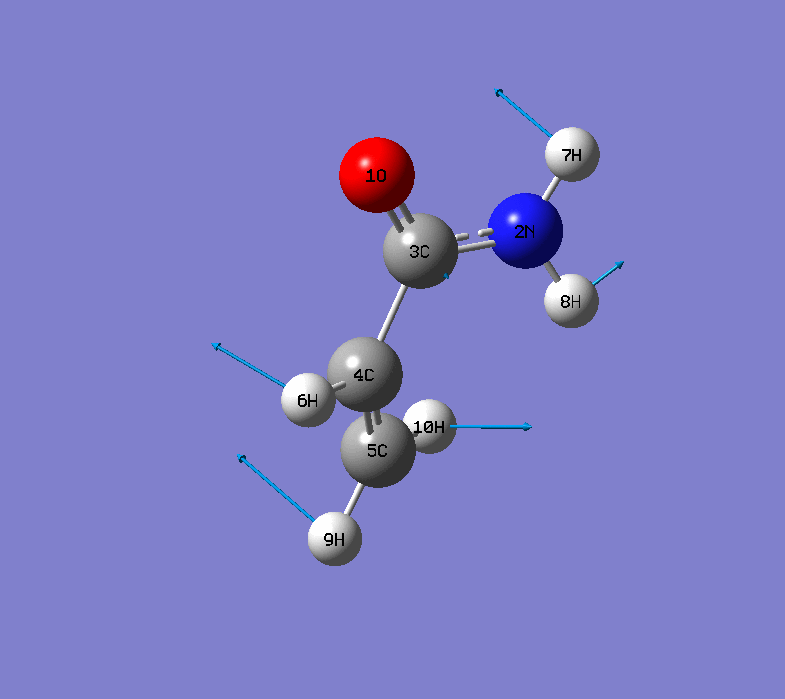

Supplement: f1 [file 148903.f1.zip › Supplymentary Material/431.60.gif]

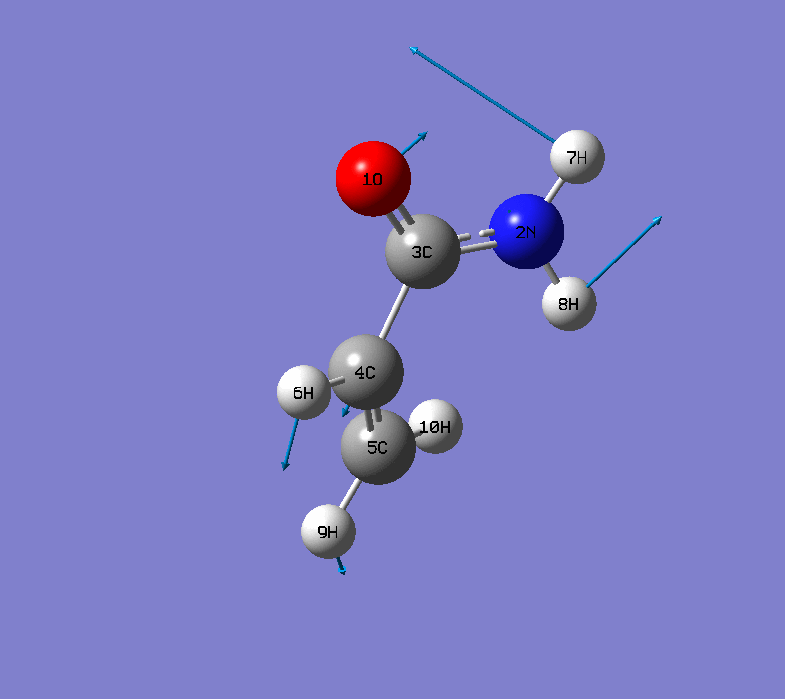

Supplement: f1 [file 148903.f1.zip › Supplymentary Material/527.19.gif]

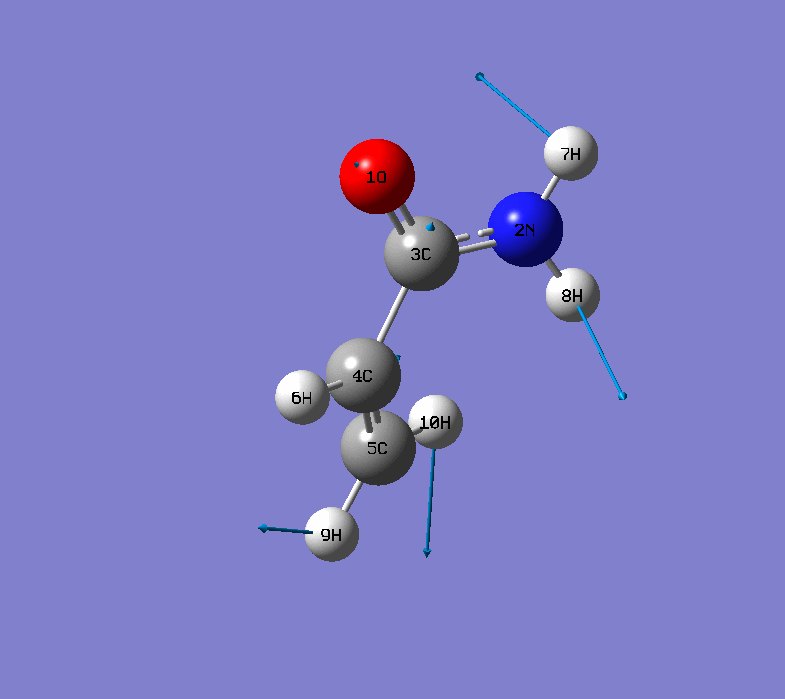

Supplement: f1 [file 148903.f1.zip › Supplymentary Material/559.39.gif]

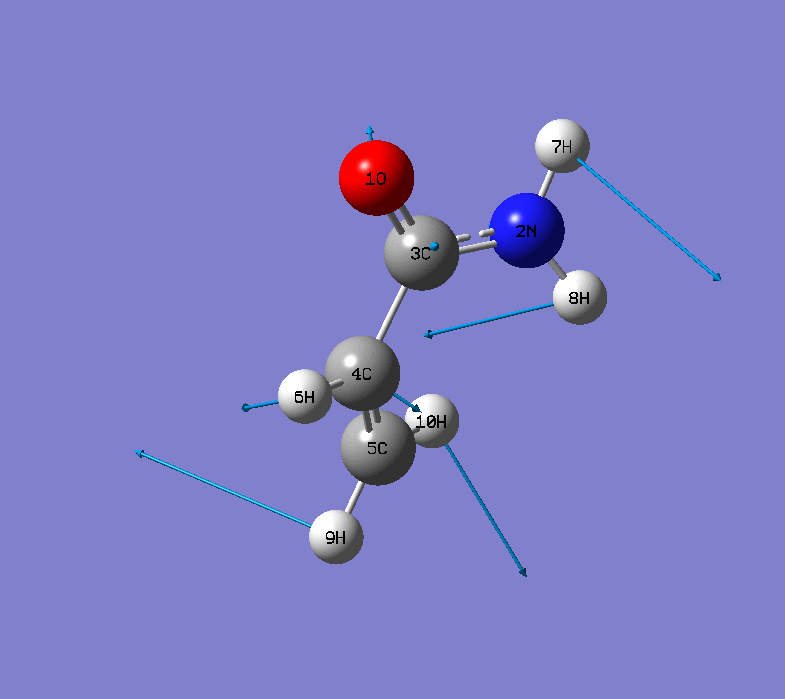

Supplement: f1 [file 148903.f1.zip › Supplymentary Material/590.55.gif]

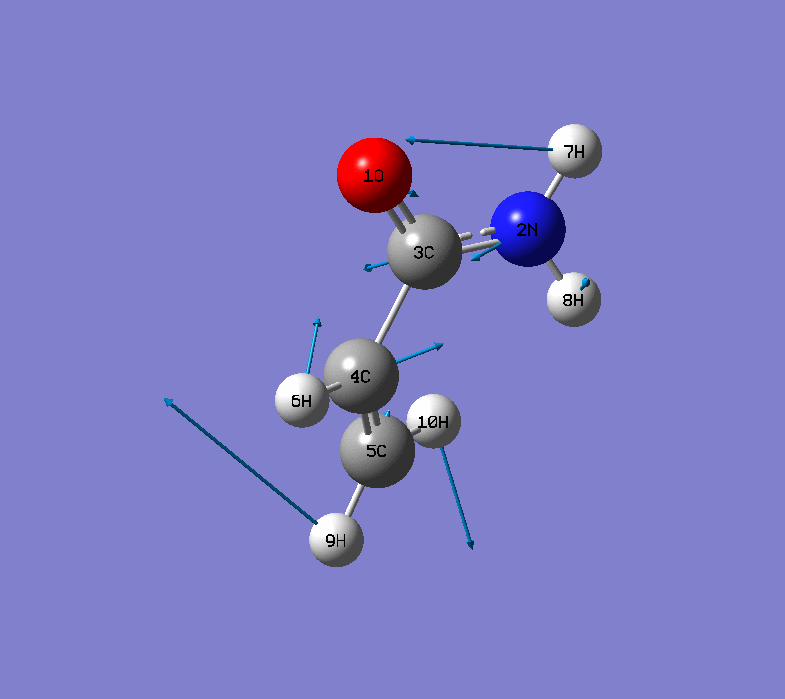

Supplement: f1 [file 148903.f1.zip › Supplymentary Material/819.30.gif]

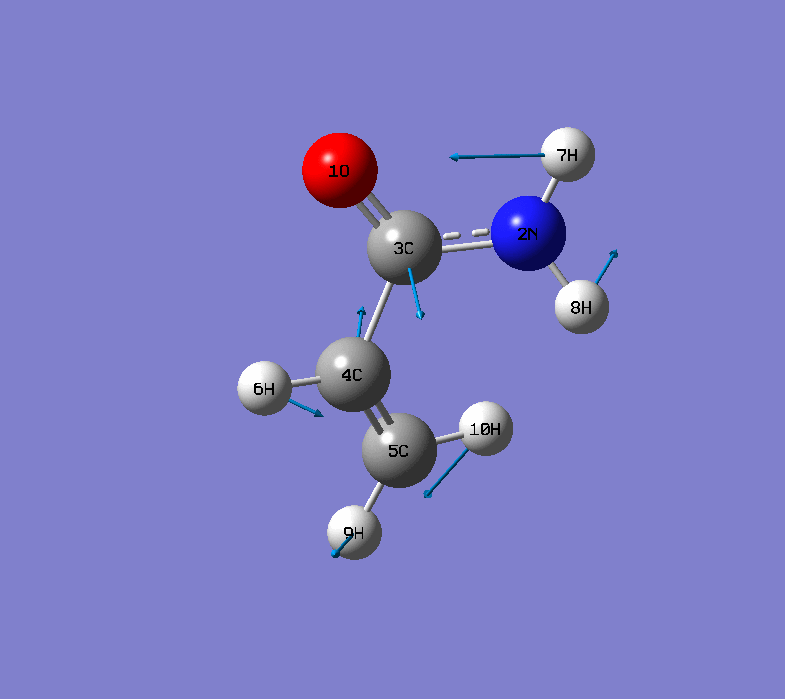

Supplement: f1 [file 148903.f1.zip › Supplymentary Material/823.28.gif]

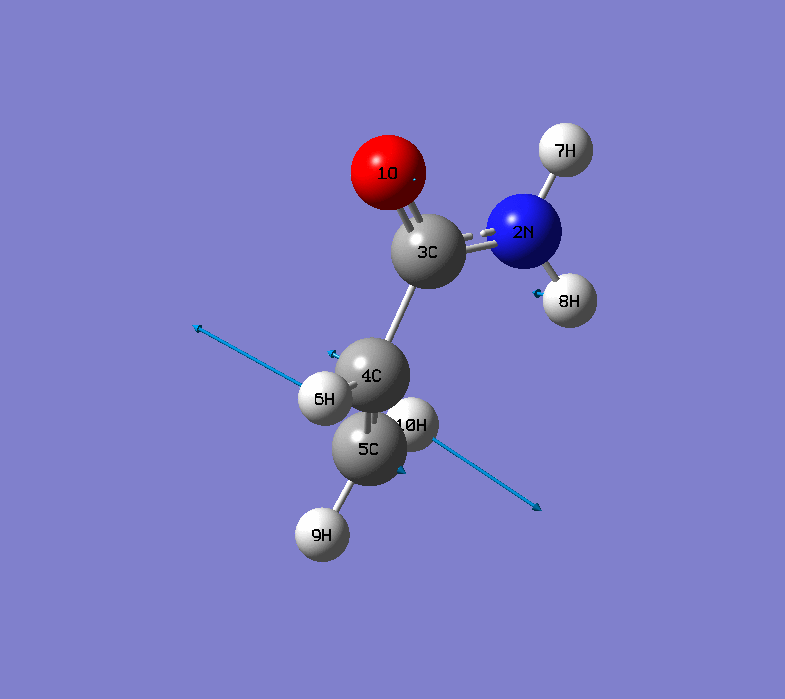

Supplement: f1 [file 148903.f1.zip › Supplymentary Material/92.94.gif]

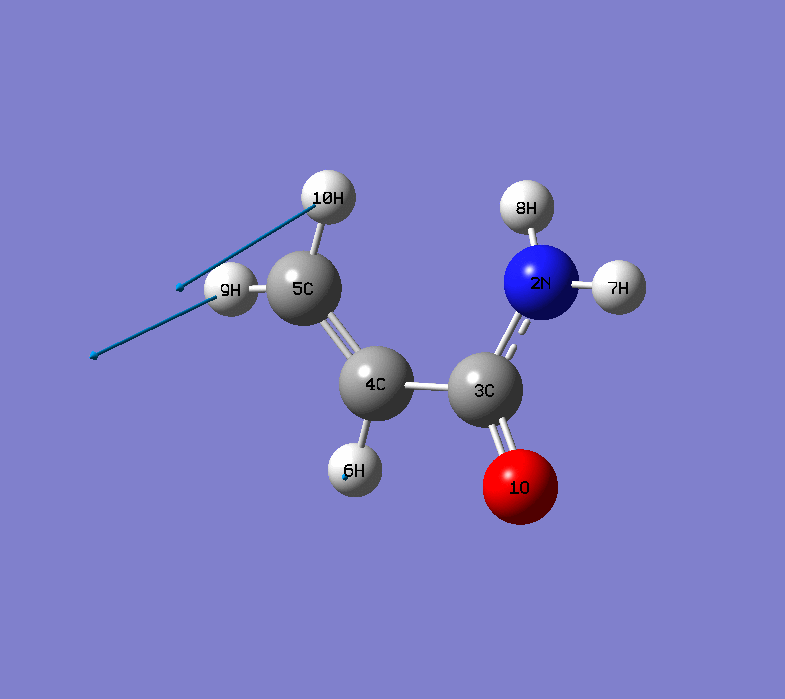

Supplement: f1 [file 148903.f1.zip › Supplymentary Material/986.46.gif]
